# Supplementary material for: Hydrological and Precipitation Extremes and Trends over the Paraiba do Sul River Basin, Brazil
Source: MDPI journal article supplement (doi:10.3390/cli11070138), 2023-06-27
Supplement: s1 [file s1]

Table S1 - Rainfall Stations

| <b>Name</b>               | <b>Code</b> | <b>Latitude</b> | <b>Longitude</b> | <b>Data Period</b> |
|---------------------------|-------------|-----------------|------------------|--------------------|
| Aldeia                    | 2142022     | -21,9514        | -42,3561         | 1939-2020          |
| Anta                      | 2242028     | -22,0353        | -42,9908         | 1944-2020          |
| Areal                     | 2243013     | -22,2439        | -43,0972         | 1939-2020          |
| Astolfo Dutra             | 2142000     | -21,3069        | -42,8606         | 1939-2020          |
| Bom Jardim                | 2242021     | -22,1569        | -42,4164         | 1941-2020          |
| Caçapava                  | 2345063     | -23,0778        | -45,7114         | 1939-2020          |
| Carangola                 | 2042000     | -20,74          | -42,0239         | 1939-2020          |
| Cardoso Moreira           | 2141003     | -21,4872        | -41,6136         | 1939-2020          |
| Cataguases                | 2142001     | -21,3894        | -42,6964         | 1939-2020          |
| Chapeu Duvas              | 2143020     | -21,5933        | -43,5033         | 1950-2020          |
| Conservatoria             | 2243004     | -22,2875        | -43,9294         | 1945-2020          |
| Dois Rios                 | 2141006     | -21,6433        | -41,8586         | 1939-2020          |
| Estevao Pinto             | 2143013     | -21,8964        | -43,0414         | 1943-2020          |
| Estrada do Cunha          | 2245055     | -22,9958        | -45,0442         | 1939-2020          |
| Fagundes                  | 2243014     | -22,2997        | -43,1781         | 1939-2020          |
| Fazenda Agulhas Negras    | 2244039     | -22,3378        | -44,5903         | 1941-2020          |
| Fazenda Mendes            | 2242022     | -22,2858        | -42,66           | 1950-2020          |
| Fazenda Santa Clara       | 2244010     | -22,6919        | -44,975          | 1939-2020          |
| Fazenda São Gabriel       | 2243202     | -22,0117        | -43,875          | 1945-2020          |
| Fazenda Sobradinho        | 2242027     | -22,2011        | -42,9            | 1939-2020          |
| Fazenda Umbaubas          | 2142004     | -21,0503        | -42,5156         | 1943-2020          |
| Fumaca                    | 2244037     | -22,2975        | -44,3106         | 1947-2020          |
| Guarani                   | 2143001     | -21,3556        | -43,0503         | 1939-2020          |
| Itamarati                 | 2243010     | -22,4853        | -43,1492         | 1939-2020          |
| Itaperuna                 | 2141004     | -21,2064        | -41,8911         | 1942-2020          |
| Manuel Duarte             | 2243008     | -22,0858        | -43,5567         | 1942-2020          |
| Mirantao                  | 2244058     | -22,2539        | -44,495          | 1971-2020          |
| Monteiro Lobato           | 2245054     | -22,9333        | -45,8333         | 1939-2020          |
| Moura Brasil              | 2243015     | -22,1403        | -43,1542         | 1939-2020          |
| Natividade da Serra       | 2345032     | -23,3833        | -45,45           | 1940-2020          |
| Paquequer                 | 2142014     | -21,8708        | -42,6403         | 1956-2020          |
| Paraíba do Sul            | 2243003     | -22,1483        | -43,2911         | 1939-2020          |
| Patrocínio de Muriae      | 2142002     | -21,15          | -42,2011         | 1939-2020          |
| Pedro do Rio              | 2243012     | -22,3325        | -43,1361         | 1939-2020          |
| Pentagna                  | 2243006     | -22,1569        | -43,7525         | 1944-2020          |
| Pidamomhangaba            | 2245048     | -22,9111        | -45,4694         | 1939-2020          |
| Ponte Alta 1              | 2345067     | -23,3292        | -45,1403         | 1939-2020          |
| Ponte do Souza            | 2244038     | -22,2706        | -44,3917         | 1939-2020          |
| Porciuncula               | 2042027     | -20,9692        | -42,0517         | 1939-2020          |
| Queluz                    | 2244001     | -22,5406        | -44,7736         | 1943-2020          |
| Ribeirão São Joaquim      | 2244034     | -22,3036        | -44,1869         | 1942-2020          |
| Rio da Cidade             | 2243011     | -22,4381        | -43,1703         | 1939-2020          |
| Rio Novo                  | 2143018     | -21,4725        | -43,1211         | 1944-2020          |
| Santa Isabel do Rio Preto | 2244033     | -22,2311        | -44,0647         | 1942-2020          |
| Santa Rita do Jacutinga   | 2244035     | -22,1506        | -44,09           | 1939-2020          |

|                        |         |          |          |           |
|------------------------|---------|----------|----------|-----------|
| São Luiz do Paraitinga | 2345065 | -23,2392 | -45,3056 | 1939-2020 |
| Taboas                 | 2243007 | -22,2086 | -43,6233 | 1941-2020 |
| Tabuleiro              | 2143017 | -21,355  | -43,2469 | 1944-2020 |
| Taubate                | 2345062 | -23,0394 | -45,5597 | 1939-2020 |
| Torreões               | 2143016 | -21,8692 | -43,5556 | 1943-2020 |
| Tres Irmãos            | 2141007 | -21,6253 | -41,9853 | 1943-2020 |
| Usina Brumado          | 2143019 | -21,8556 | -43,8864 | 1945-2020 |
| Usina Ituere           | 2143000 | -21,3094 | -43,2022 | 1939-2020 |
| Usina Mauricio         | 2142006 | -21,4714 | -42,8131 | 1944-2020 |
| Valenca                | 2243005 | -22,2189 | -43,7036 | 1944-2020 |
| Visconde de Maua       | 2244047 | -22,33   | -44,5383 | 1939-2020 |
| Volta Redonda          | 2244041 | -22,5011 | -44,0919 | 1943-2020 |
| Zelinda                | 2244036 | -22,2431 | -44,2636 | 1939-2020 |

Table S2 - Streamflow Stations

| Name                                 | Code     | Latitude | Longitude | Data Period |
|--------------------------------------|----------|----------|-----------|-------------|
| Anta                                 | 58630002 | -22,0353 | -42,9908  | 1943-2020   |
| Astolfo Dutra                        | 58735000 | -21,3069 | -42,8619  | 1939-2020   |
| Bom Jardim                           | 58827000 | -22,1567 | -42,4161  | 1973-2020   |
| Campos - Ponte Municipal             | 58974000 | -21,7533 | -41,3003  | 1939-2020   |
| Carangola                            | 58930000 | -20,74   | -42,0239  | 1955-2020   |
| Cardoso Moreira                      | 58960000 | -21,4872 | -41,6167  | 1939-2020   |
| Cataguases                           | 58770000 | -21,3894 | -42,6964  | 1966-2020   |
| Chapeu D'uvas                        | 58470000 | -21,5939 | -43,5047  | 1939-2020   |
| Dois Rios                            | 58874000 | -21,6442 | -41,8589  | 1944-2020   |
| Estevão Pinto                        | 58610000 | -21,8964 | -43,0414  | 1939-2020   |
| Estrada Do Cunha                     | 58030000 | -22,9939 | -45,0439  | 1939-2020   |
| Fagundes                             | 58434000 | -22,2997 | -43,1781  | 1939-2020   |
| Fazenda Santa Clara                  | 58220000 | -22,6925 | -44,9753  | 1939-2020   |
| Fazenda Sobradinho                   | 58420000 | -22,1994 | -42,8969  | 1962-2020   |
| Fazenda Umbaúbas                     | 58910000 | -21,0506 | -42,5142  | 1942-2020   |
| Guarani                              | 58730001 | -21,3556 | -43,0503  | 1944-2020   |
| Guaratinguetá                        | 58204000 | -22,8119 | -45,1825  | 1939-2020   |
| Itaperuna                            | 58940000 | -21,2072 | -41,8922  | 1939-2020   |
| Manuel De Morais                     | 58846000 | -22,0242 | -42,1344  | 1939-2020   |
| Manuel Duarte                        | 58585000 | -22,0844 | -43,5589  | 1952-2020   |
| Moreli (Parada Moreli)               | 58425000 | -22,1925 | -43,0075  | 1939-2020   |
| Paquequer                            | 58648001 | -21,8764 | -42,63    | 1950-2020   |
| Patrocínio Do Muriaé                 | 58920000 | -21,1506 | -42,2144  | 1939-2020   |
| Pedro Do Rio                         | 58405000 | -22,3319 | -43,1317  | 1939-2020   |
| Piau                                 | 58750000 | -21,4967 | -43,3172  | 1939-2020   |
| Pindamonhangaba                      | 58183000 | -22,9117 | -45,47    | 1939-2020   |
| Piracuama                            | 58463000 | -22,8094 | -45,5258  | 1951-2020   |
| Ponte Alta 1                         | 58060000 | -23,33   | -45,1436  | 1939-2020   |
| Ponte De Pindamonhangaba             | 58182500 | -22,9119 | -45,4711  | 1984-2020   |
| Ponte Do Souza                       | 58530000 | -22,2708 | -44,39    | 1939-2020   |
| Porciuncula                          | 58934000 | -20,9633 | -42,0372  | 1939-2020   |
| Queluz                               | 58235100 | -22,54   | -44,7728  | 1939-2020   |
| Resende                              | 58250000 | -22,4667 | -44,4453  | 1939-2020   |
| Rio Novo                             | 58755000 | -21,4739 | -43,1289  | 1939-2020   |
| Rio Preto                            | 58550001 | -22,0861 | -43,82    | 1939-2020   |
| São Fidelis                          | 58880001 | -21,6453 | -41,7522  | 1939-2020   |
| Tabuleiro                            | 58720000 | -21,3547 | -43,2478  | 1987-2020   |
| Três Irmãos                          | 58795000 | -21,6258 | -41,9853  | 1939-2020   |
| Uel Santa Cecília Barra Do Pirai     | 58370000 | -22,45   | -43,7972  | 1939-2020   |
| Uhe Funil Jusante 2                  | 58300000 | -22,5375 | -44,1758  | 1941-2020   |
| Uhe Funil Montante 1                 | 58235000 | -22,5403 | -44,7739  | 1939-2020   |
| Uhe Funil Montante 2                 | 58218000 | -22,6617 | -45,0125  | 1939-2020   |
| Uhe Ilha Dos Pombos Fazenda Piracema | 58620000 | -22,0864 | -43,1511  | 1939-2020   |
| Uhe Simplício Moura Brasil           | 58440000 | -22,1403 | -43,1542  | 1950-2020   |
| Visconde De Mauá                     | 58525000 | -22,33   | -44,5389  | 1939-2020   |

|               |          |          |          |           |
|---------------|----------|----------|----------|-----------|
| Volta Redonda | 58305001 | -22,5019 | -44,0911 | 1941-2020 |
| Zelinda       | 58535000 | -22,2442 | -44,265  | 1949-2020 |
